# Supplementary material for: In Silico and Experimental Investigation of the Biological Potential of Some Recently Developed Carprofen Derivatives
Source: MDPI journal article supplement (doi:10.3390/molecules27092722), 2022-04-23
Supplement: s1 [file s1]

## Supplementary Materials

# In Silico and Experimental Investigation of the Biological Potential of Some Recently Developed Carprofen Derivatives

Florea Dumitrascu <sup>1,†</sup>, Ana-Maria Udrea <sup>2,3,†</sup>, Mino R. Caira <sup>4,\*</sup>, Diana Camelia Nuta <sup>5,\*</sup>, Carmen Limban <sup>5</sup>, Mariana Carmen Chifiriuc <sup>6,7,8</sup>, Marcela Popa <sup>6</sup>, Coralia Bleotu <sup>2,6,9</sup>, Anamaria Hanganu <sup>1</sup>, Denisa Dumitrescu <sup>10</sup> and Speranta Avram <sup>11</sup>

- <sup>1</sup> Center for Organic Chemistry “C.D. Nenitzescu”, Romanian Academy, Spl. Independentei 202B, 060023 Bucharest, Romania; fdumitra@yahoo.com (F.D.); ana.hanganu@cco.ro (A.H.)
  - <sup>2</sup> Research Institute of the University of Bucharest—ICUB, University of Bucharest, 91-95 Splaiul Independentei, 050095 Bucharest, Romania; ana.udrea@inflpr.ro (A.-M.U.); cbleotu@yahoo.com (C.B.)
  - <sup>3</sup> National Institute of Laser, Plasma and Radiation Physics, 409 Atomistilor Str., 077125 Magurele, Romania
  - <sup>4</sup> Department of Chemistry, University of Cape Town, Rondebosch 7701, South Africa
  - <sup>5</sup> Department of Pharmaceutical Chemistry, Faculty of Pharmacy, “Carol Davila” University of Medicine and Pharmacy, 6 Traian Vuia Street, 020956 Bucharest, Romania; carmen.limban@umfcd.ro
  - <sup>6</sup> Department of Microbiology, Faculty of Biology, University of Bucharest, 1-3 Aleea Portocalelor Str., District 5, 060101 Bucharest, Romania; carmen.chifiriuc@bio.unibuc.ro (M.C.C.); marcela.popa@bio.unibuc.ro (M.P.)
  - <sup>7</sup> Romanian Academy of Scientists, 54 Spl. Independenței Str., District 5, 50085 Bucharest, Romania
  - <sup>8</sup> The Romanian Academy, 25, Calea Victoriei, Sector 1, District 1, 010071 Bucharest, Romania
  - <sup>9</sup> Department of Cellular and Molecular Pathology, Stefan S. Nicolau Institute of Virology, 030304 Bucharest, Romania
  - <sup>10</sup> Faculty of Pharmacy, Ovidius University Constanta, Str. Cpt. Av. Al. Serbanescu, Campus Corp C, 900470 Constanta, Romania; denisa.dumitrescu2014@gmail.com
  - <sup>11</sup> Department of Anatomy, Animal Physiology, and Biophysics, Faculty of Biology, University of Bucharest, 36-46 M. Kogălniceanu Boulevard, 050107 Bucharest, Romania; speranta.avram@gmail.com
- \* Correspondence: mino.caira@uct.ac.za (M.R.C.); diana.nuta@umfcd.ro (D.C.N.); Tel.: +40-213-180-739 (D.C.N.)
- † These authors equally contribute to this work.

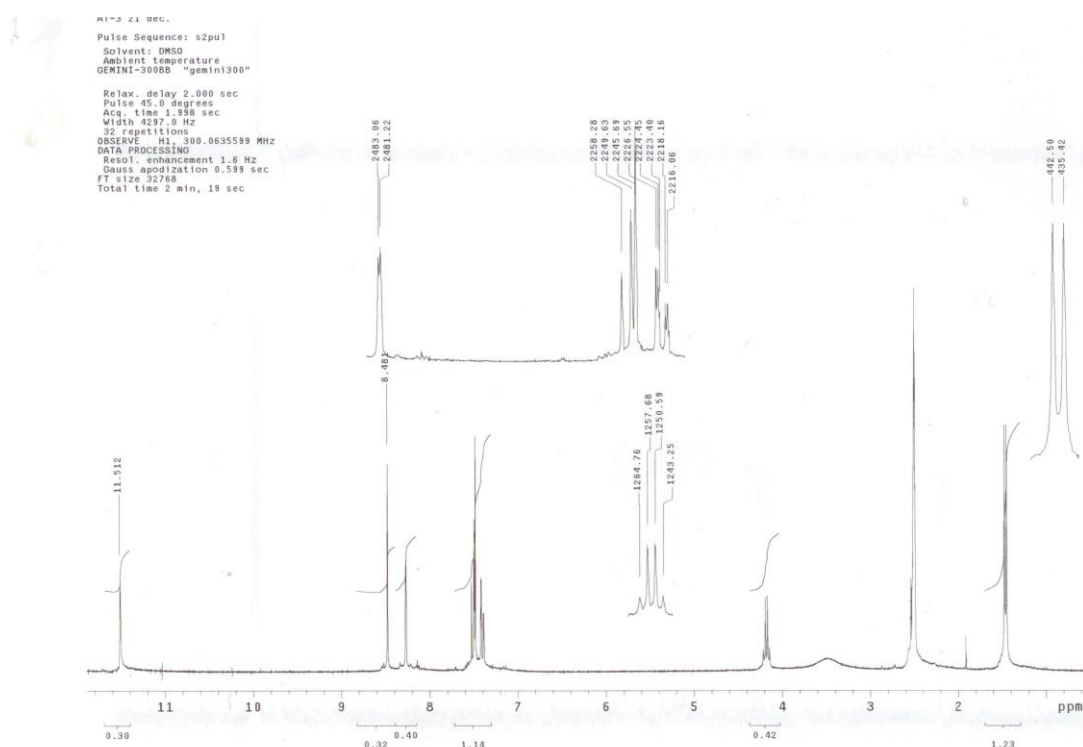

**Figure S1a.** The  $^1\text{H}$ -NMR spectrum of 2-(3-Bromo-6-chloro-9H-carbazol-2-yl)propanoic acid (**2**).

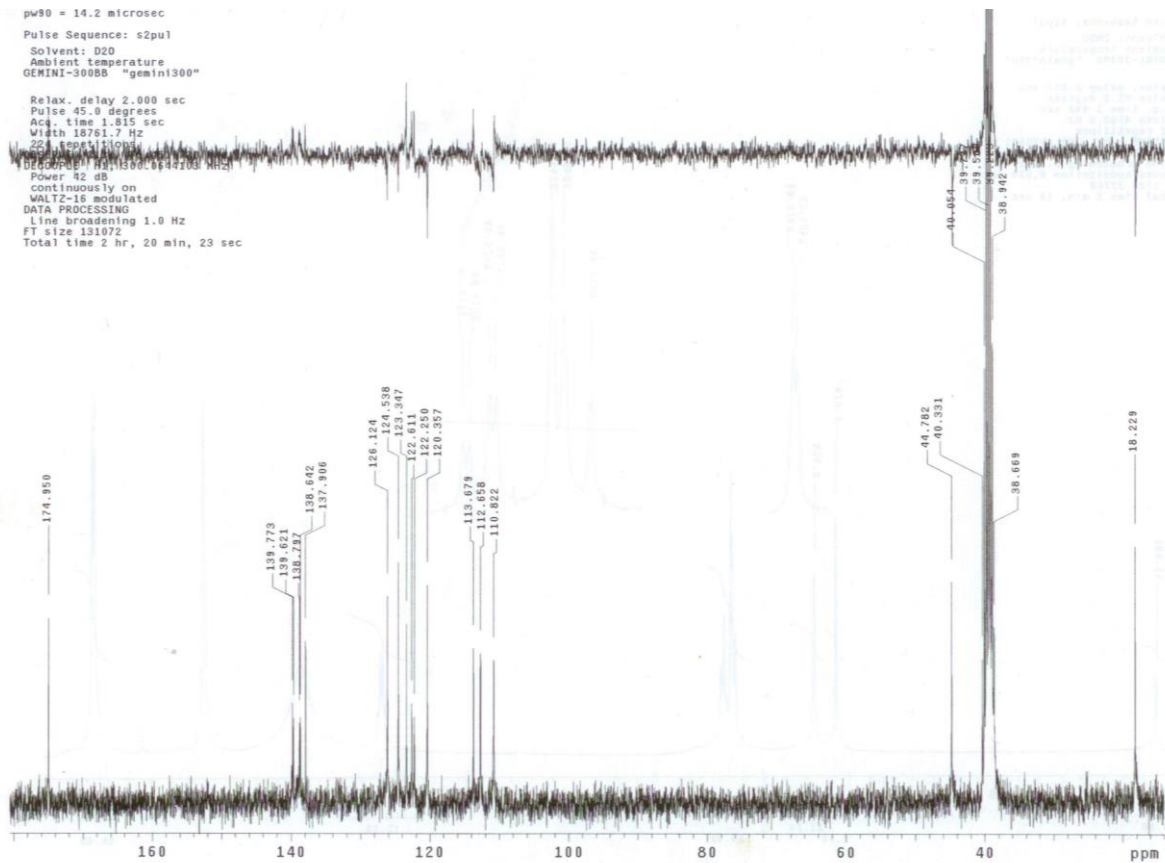

**Figure S1b.** The  $^{13}\text{C}$ -NMR spectrum of 2-(3-Bromo-6-chloro-9H-carbazol-2-yl)propanoic acid (**2**).

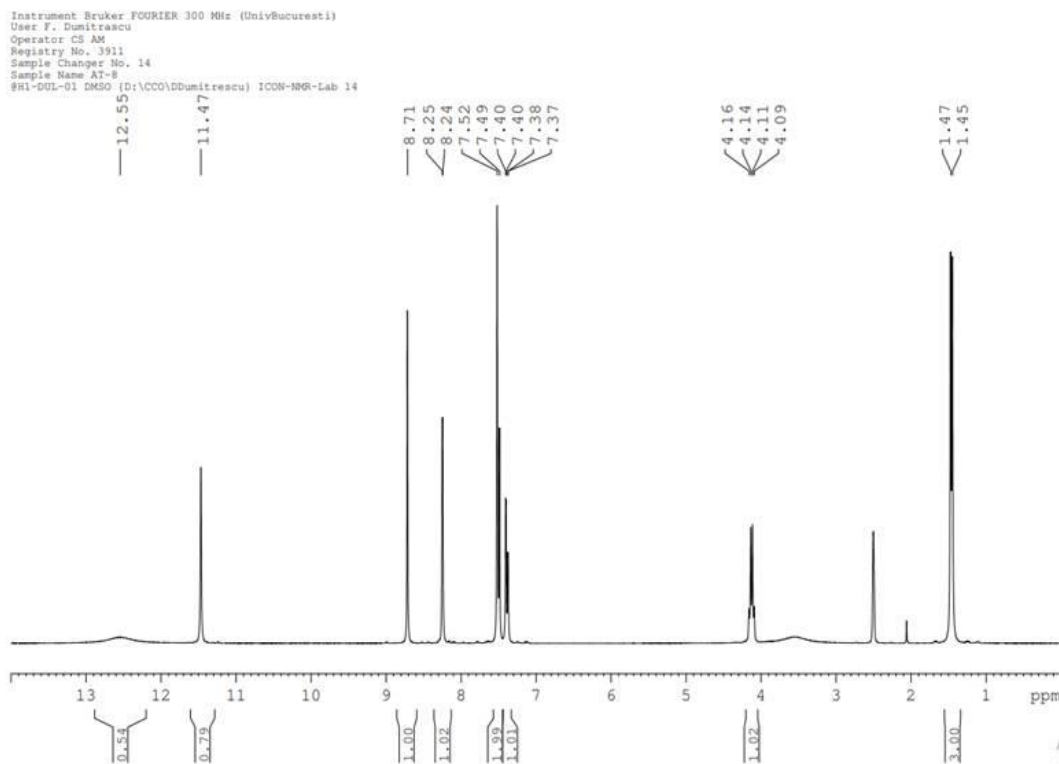

**Figure S2a.** The  $^1\text{H}$ -NMR spectrum of 2-(3-Iodo-6-chloro-9H-carbazol-2-yl)propanoic acid (**3**).

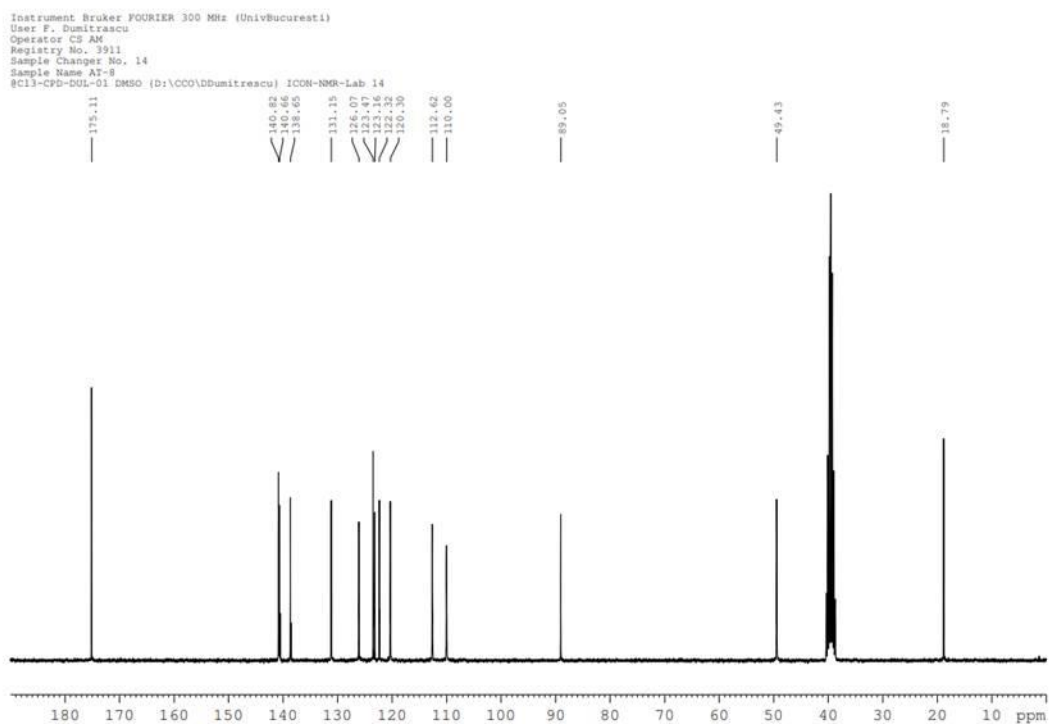

**Figure S2b.** The  $^{13}\text{C}$ -NMR spectrum of 2-(3-Iodo-6-chloro-9H-carbazol-2-yl)propanoic acid (**3**).

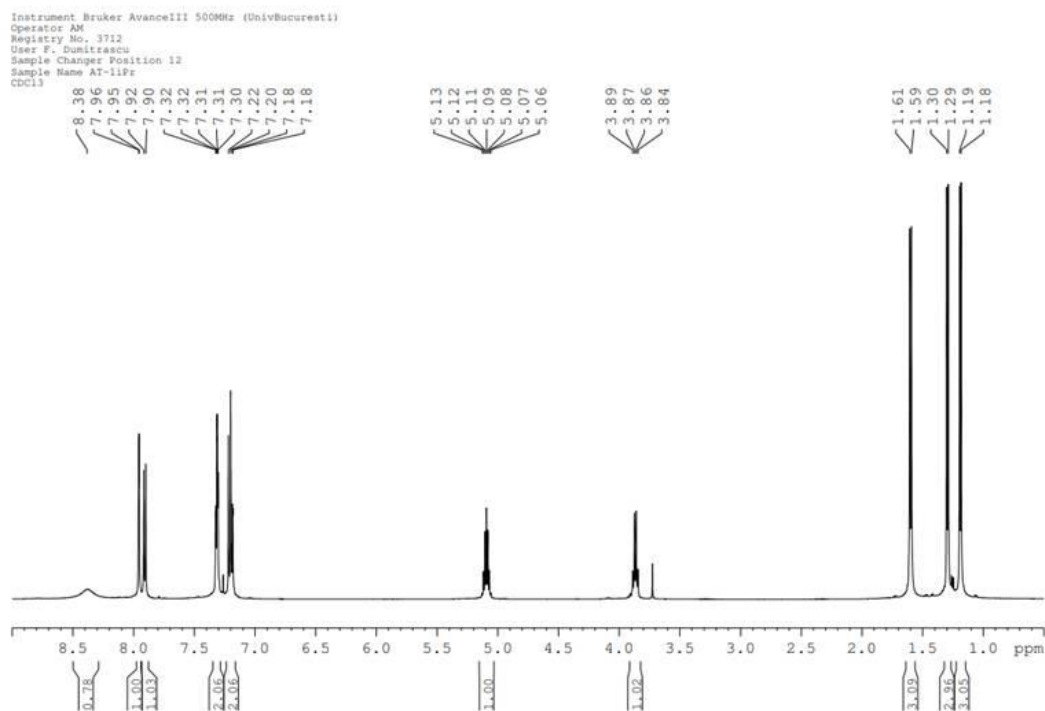

**Figure S3a.** The <sup>1</sup>H-NMR spectrum of Isopropyl 2-(6-chloro-9H-carbazol-2-yl)propanoate (**4**).

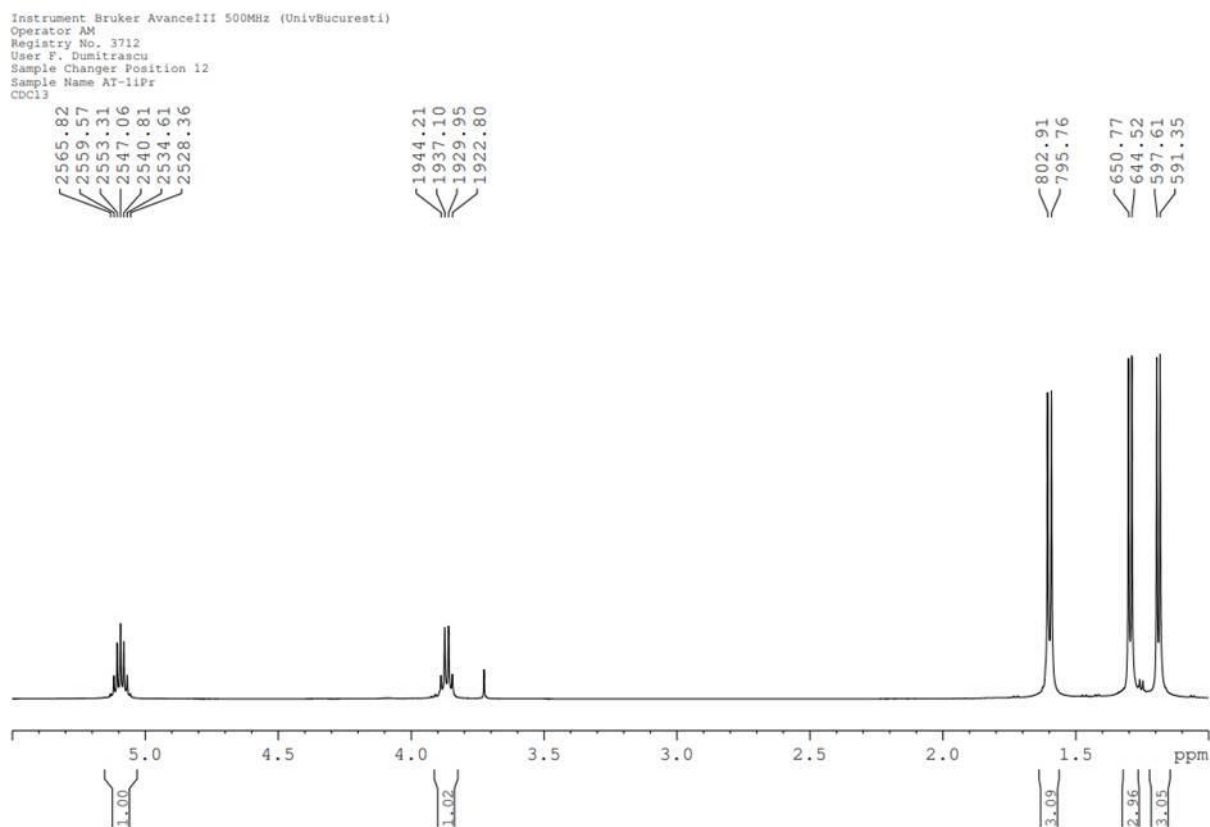

**Figure S3b.** The <sup>1</sup>H-NMR spectrum (details) of Isopropyl 2-(6-chloro-9H-carbazol-2-yl)propanoate (**4**).

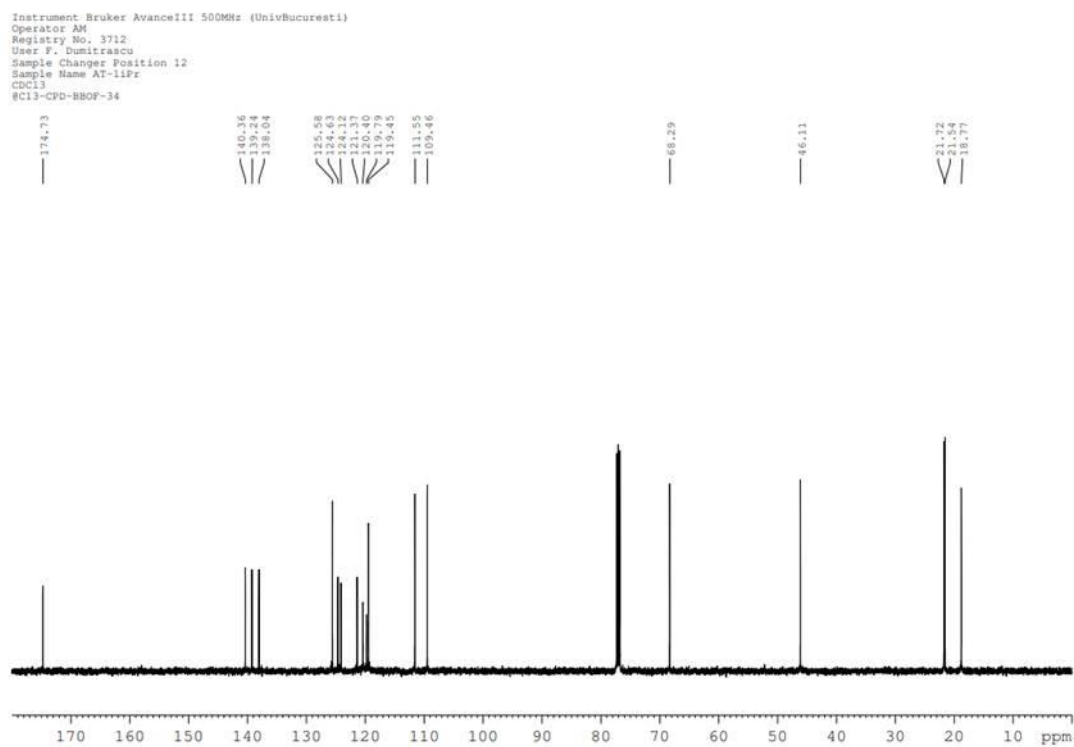

**Figure S3c.** The  $^{13}\text{C}$ -NMR spectrum of Isopropyl 2-(6-chloro-9H-carbazol-2-yl)propanoate (**4**).

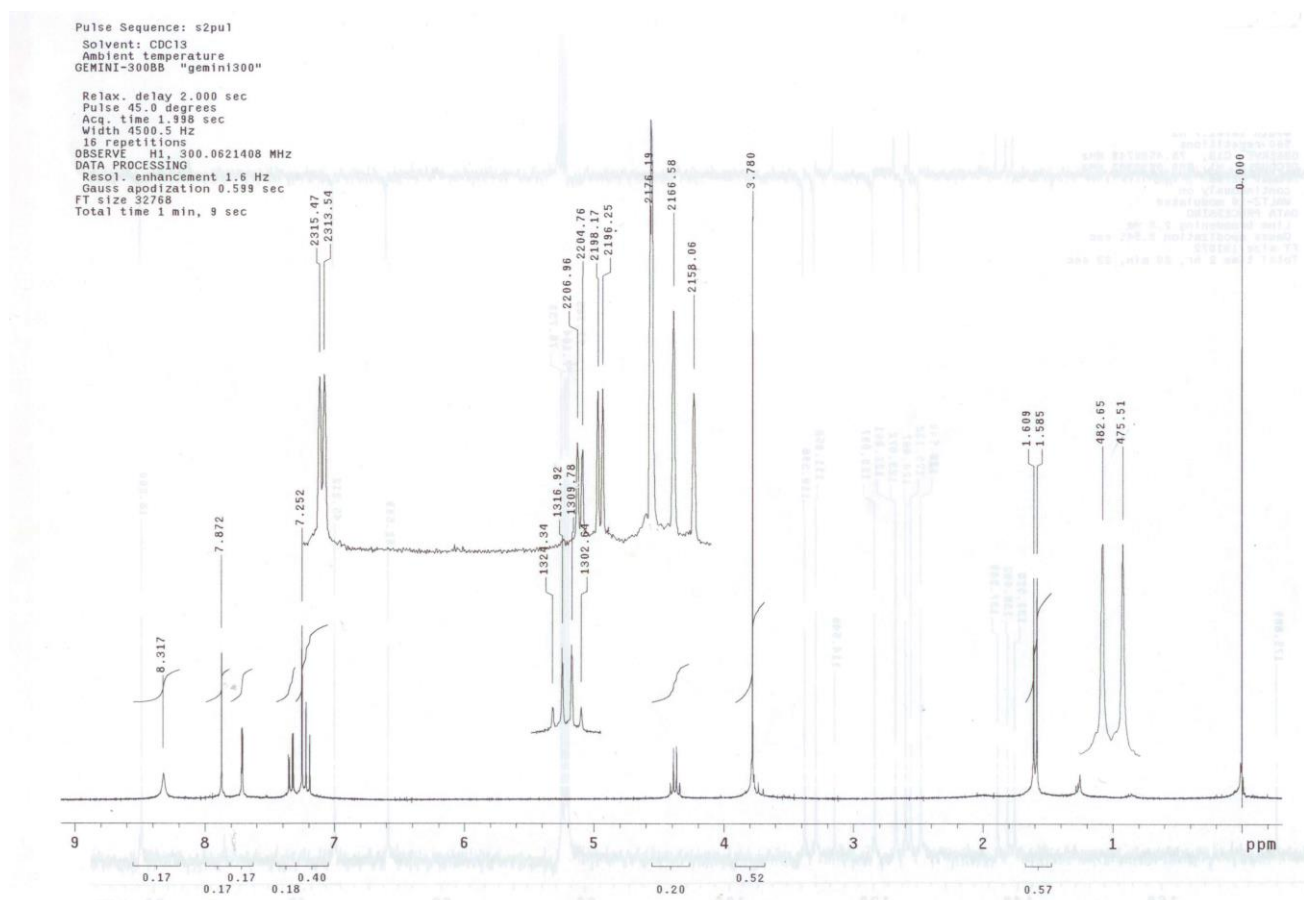

**Figure S4a.** The <sup>1</sup>H-NMR spectrum of Methyl 2-(3-Bromo-6-chloro-9H-carbazol-2-yl)propanoate (**5**).

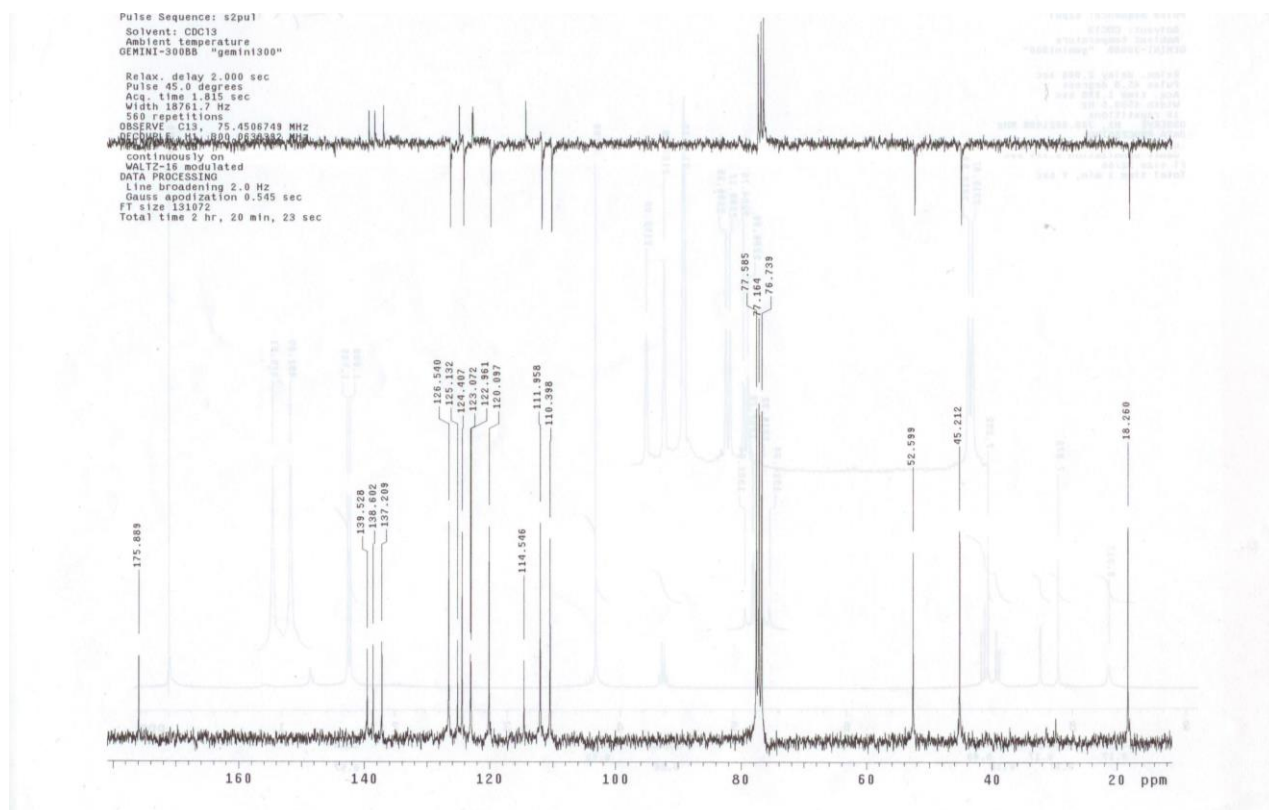

**Figure S4b.** The <sup>13</sup>C-NMR spectrum of Methyl 2-(3-Bromo-6-chloro-9H-carbazol-2-yl)propanoate (**5**).

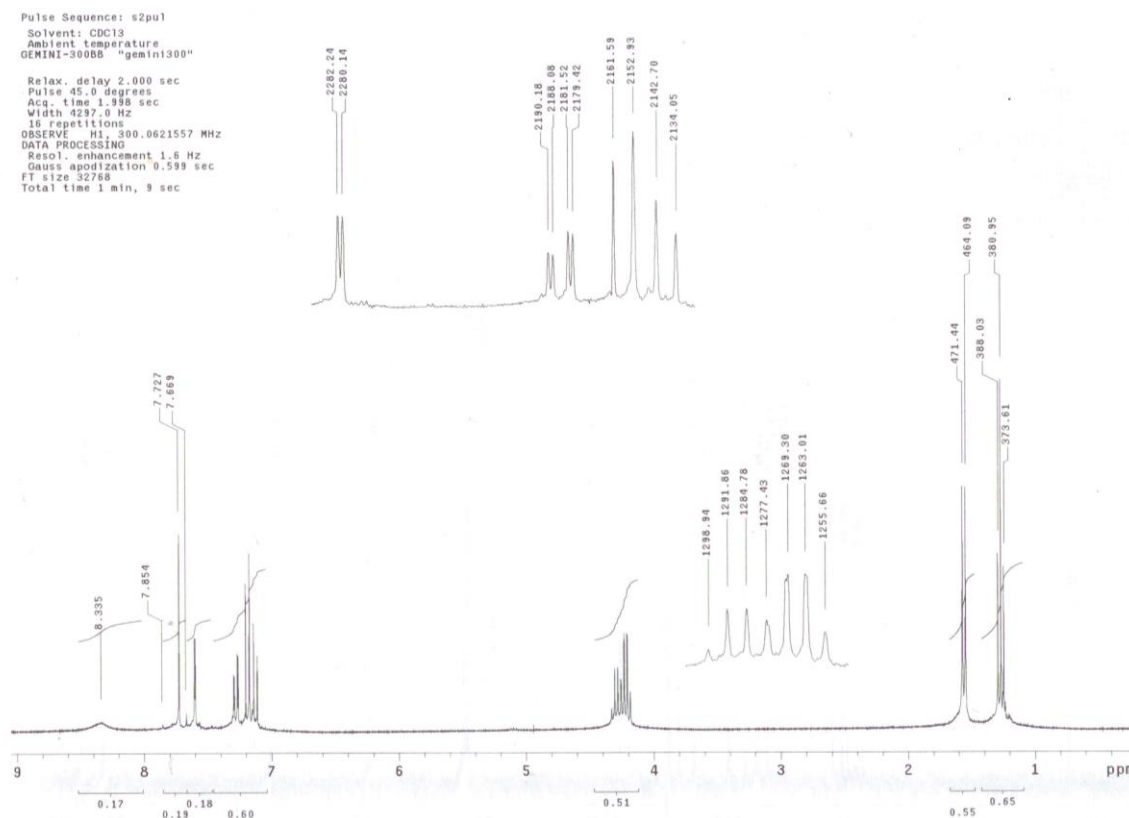

**Figure S5a.** The <sup>1</sup>H-NMR spectrum of Ethyl 2-(3-Bromo-6-chloro-9H-carbazol-2-yl)propanoate (**6**).

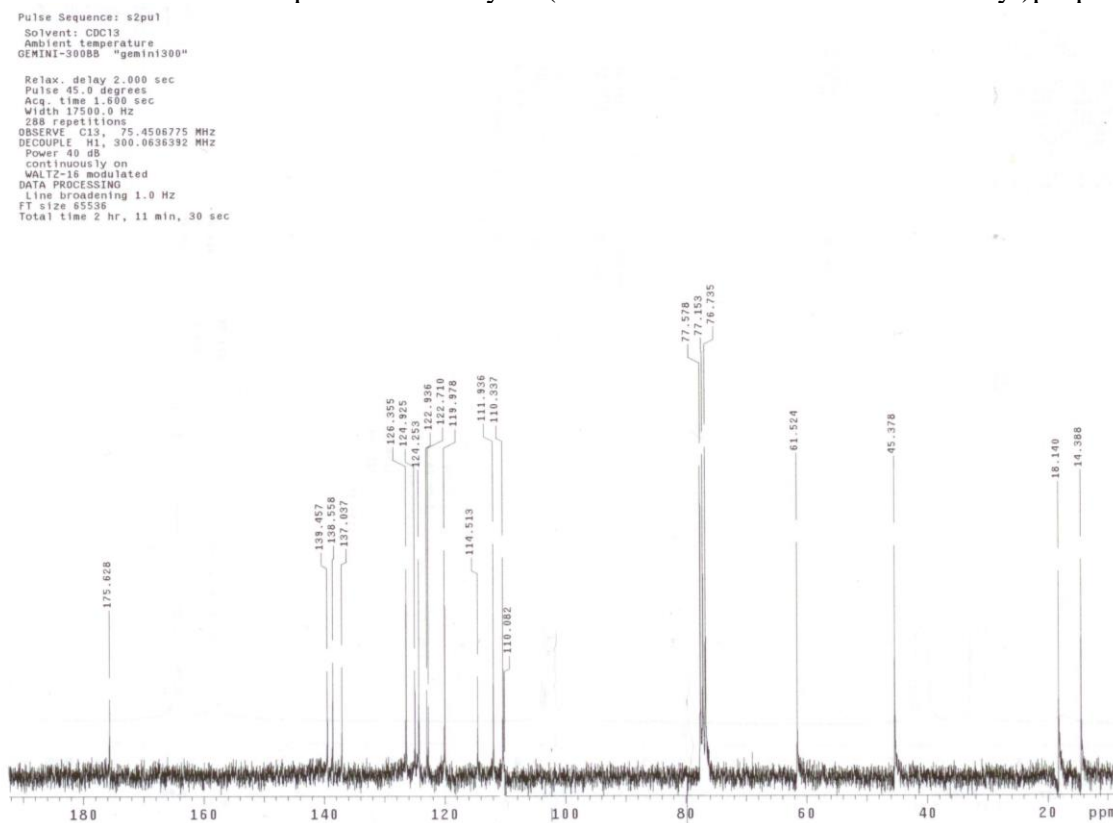

**Figure S5b.** The <sup>13</sup>C-NMR spectrum of Ethyl 2-(3-Bromo-6-chloro-9H-carbazol-2-yl)propanoate (**6**).

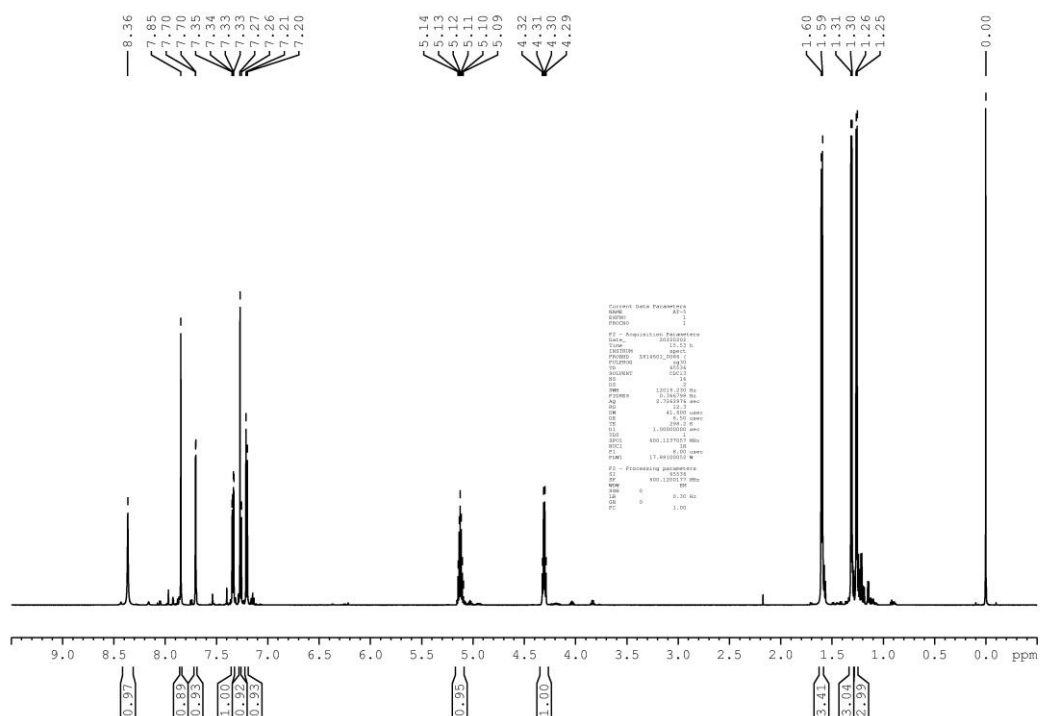

**Figure S6a.** The  $^1\text{H}$ -NMR spectrum of Isopropyl 2-(3-Bromo-6-chloro-9H-carbazol-2-yl)propanoate (**7**).

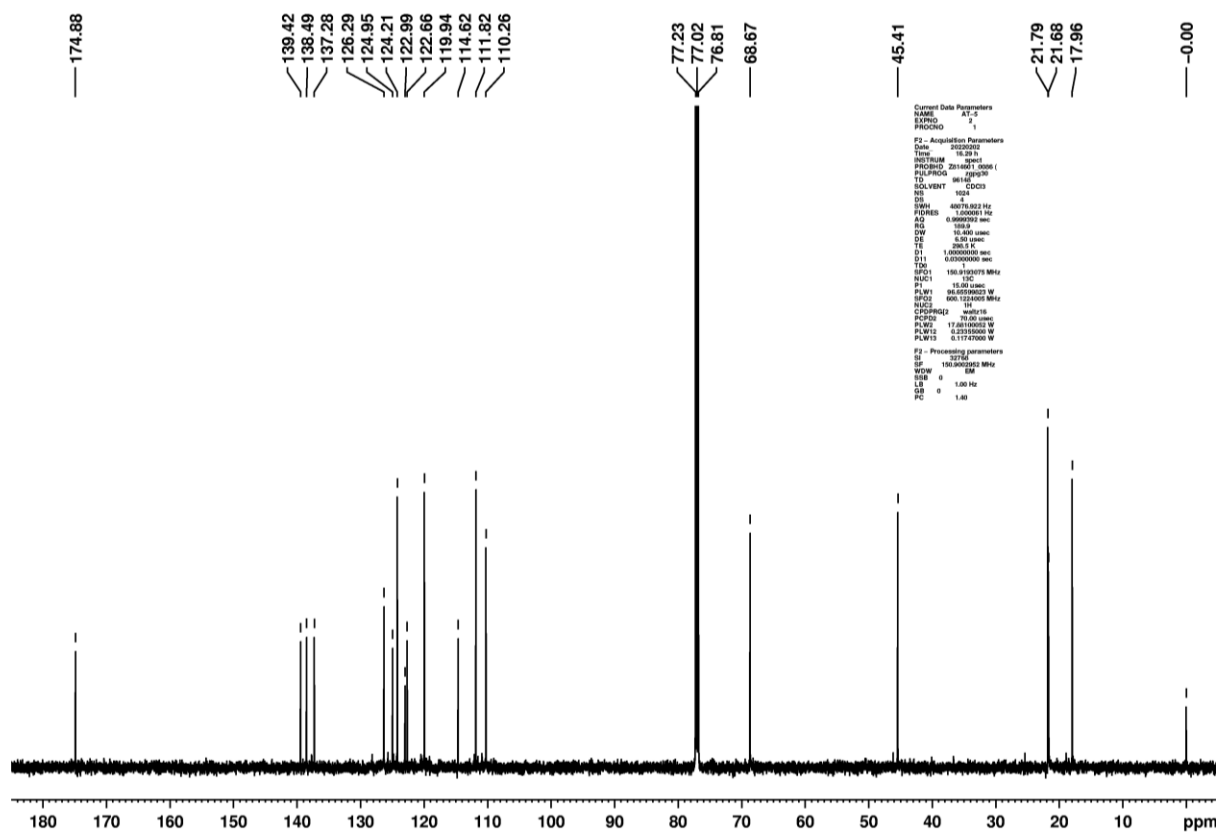

**Figure S6b.** The  $^{13}\text{C}$ -NMR spectrum of Isopropyl 2-(3-Bromo-6-chloro-9H-carbazol-2-yl)propanoate (**7**).



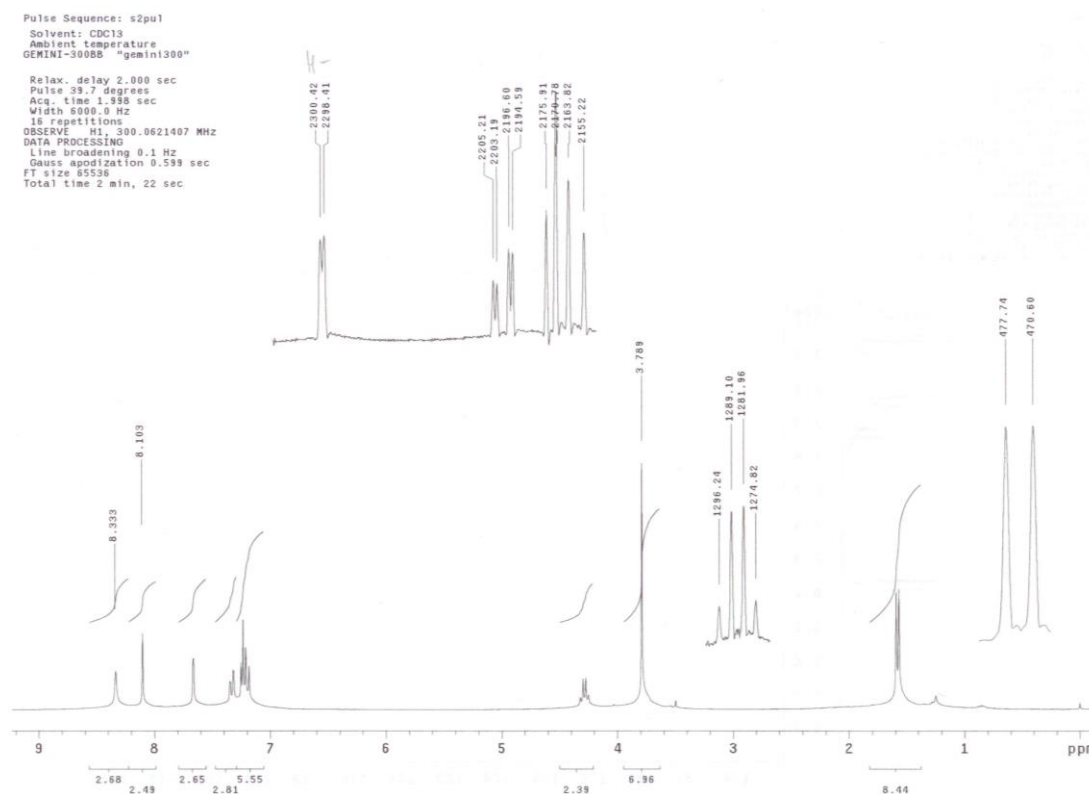

**Figure S7a.** The <sup>1</sup>H-NMR spectrum of Methyl 2-(3-iodo-6-chloro-9H-carbazol-2-yl)propanoate (**8**).

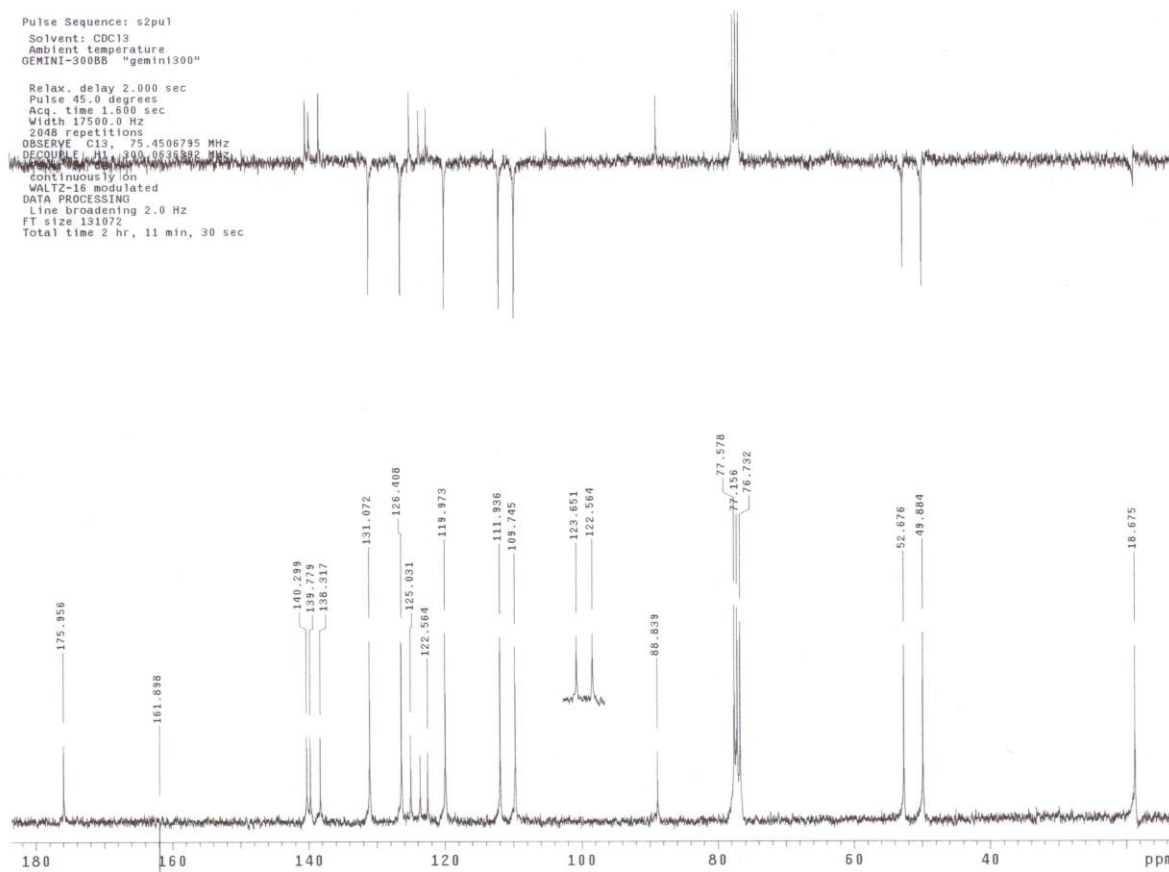

**Figure S7b.** The <sup>13</sup>C-NMR spectrum of Methyl 2-(3-iodo-6-chloro-9H-carbazol-2-yl)propanoate (**8**).

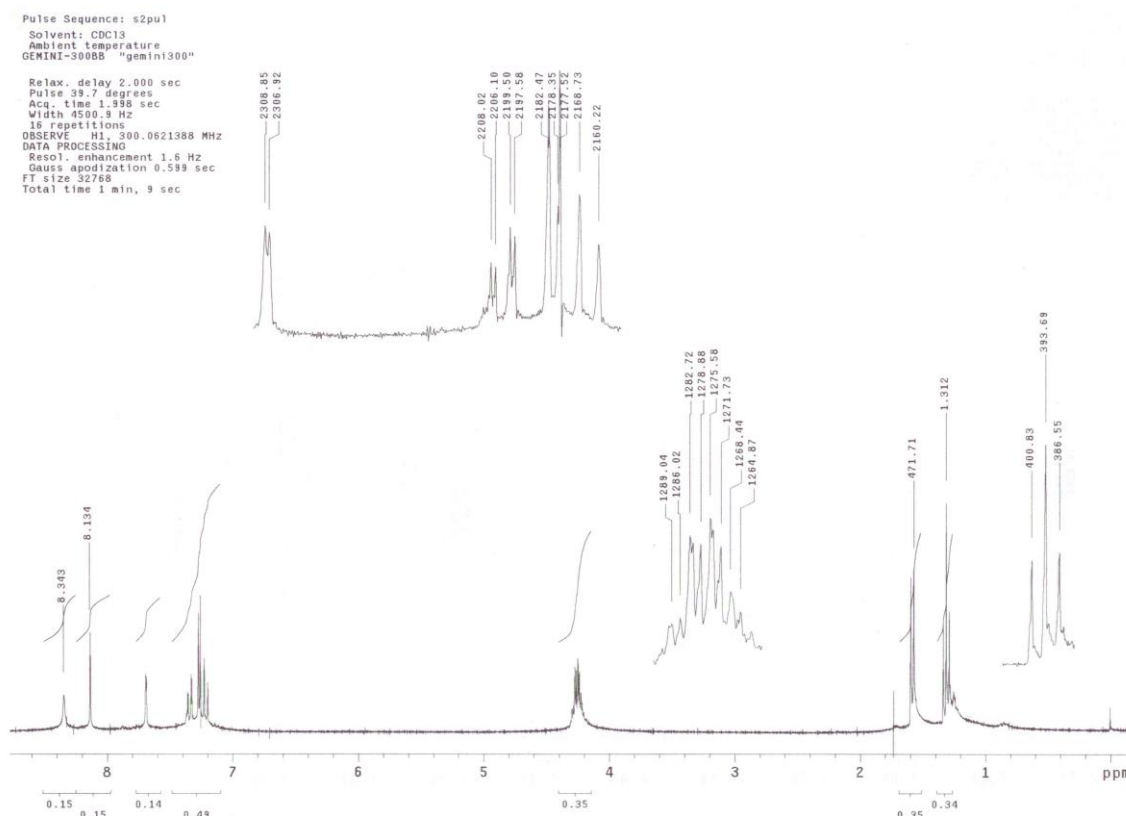

**Figure S8a.** The <sup>1</sup>H-NMR spectrum of Ethyl 2-(3-iodo-6-chloro-9H-carbazol-2-yl)propanoate (**9**).

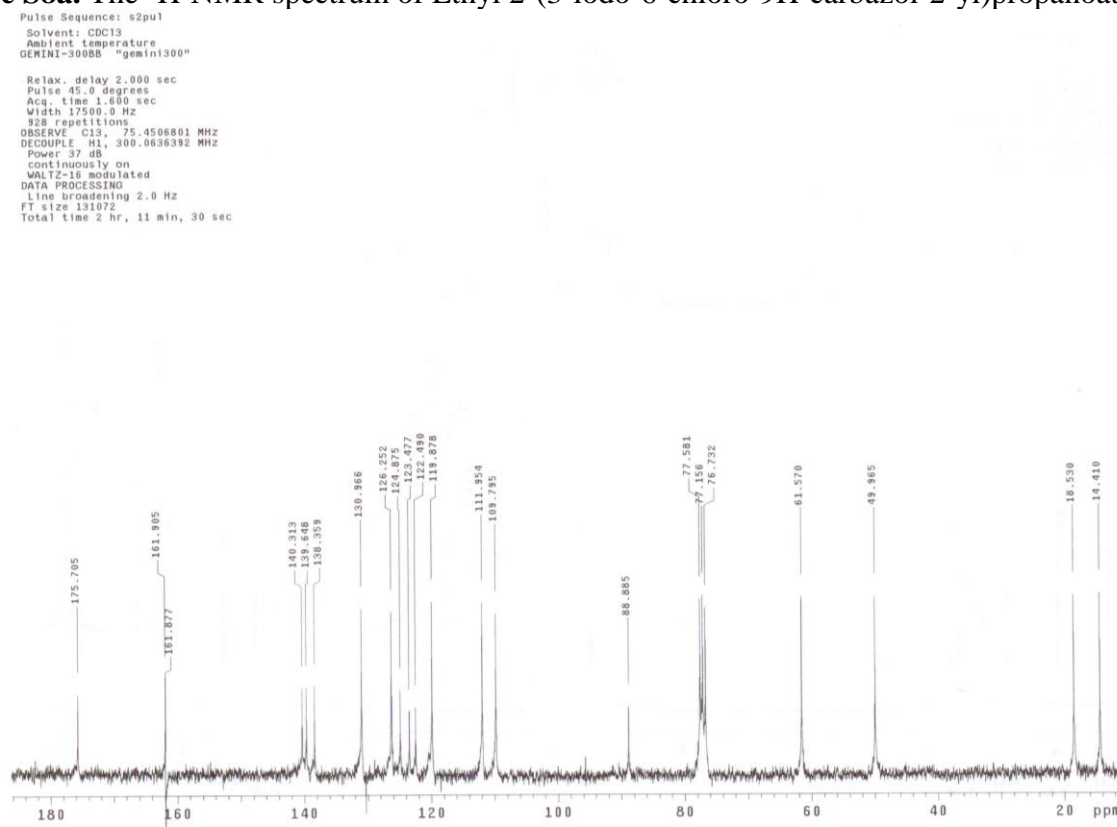

**Figure S8b.** The <sup>13</sup>C-NMR spectrum of Ethyl 2-(3-iodo-6-chloro-9H-carbazol-2-yl)propanoate (**9**).

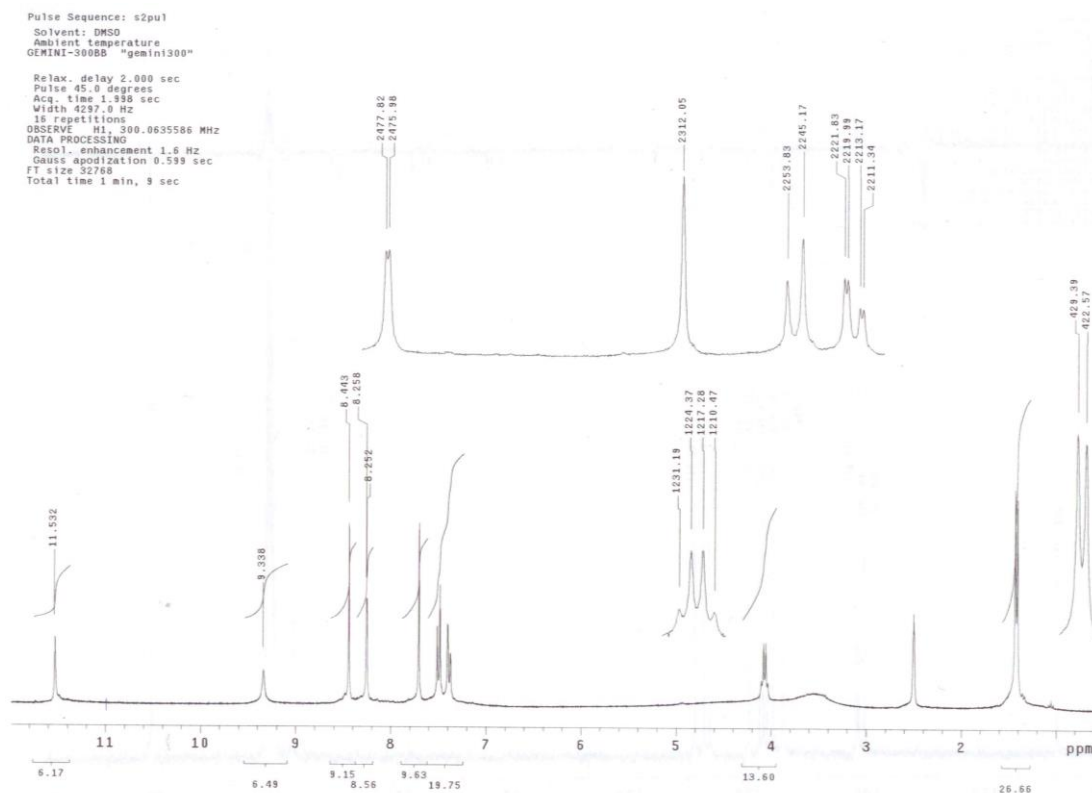

**Figure S9a.** The  $^1\text{H}$ -NMR spectrum of Hydrazide of 2-(3-Bromo-6-chloro-9H-carbazol-2-yl)propanoic acid (10).

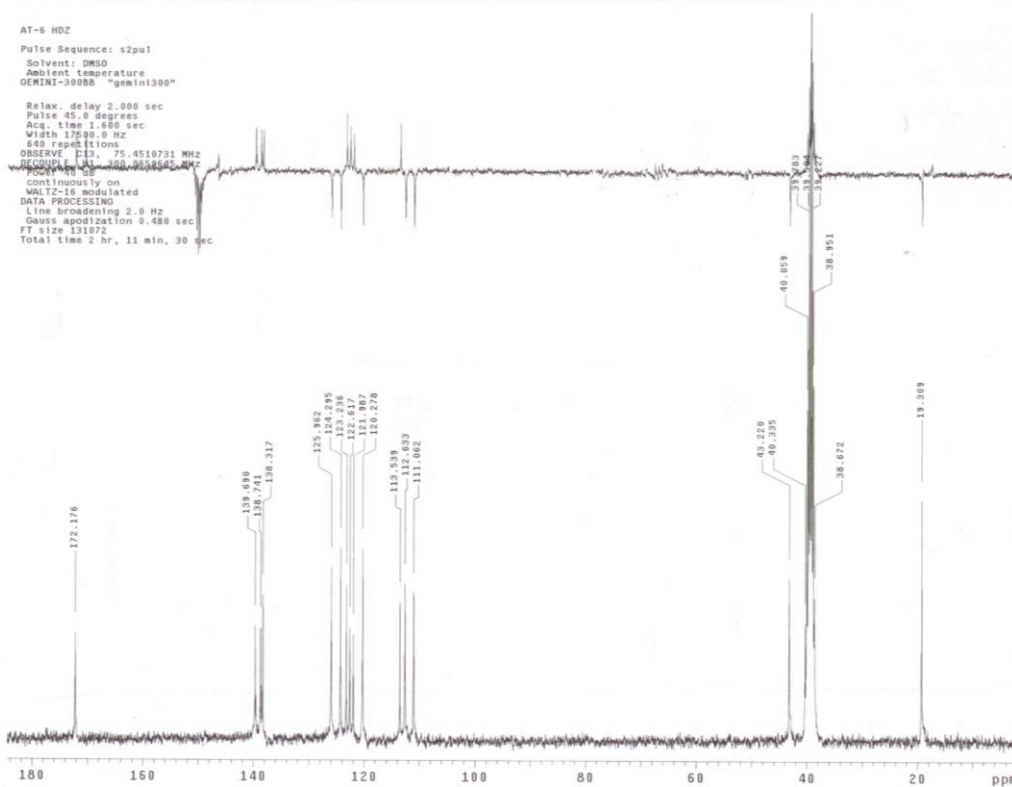

**Figure S9b.** The  $^{13}\text{C}$ -NMR spectrum of Hydrazide of 2-(3-Bromo-6-chloro-9H-carbazol-2-yl)propanoic acid (10).

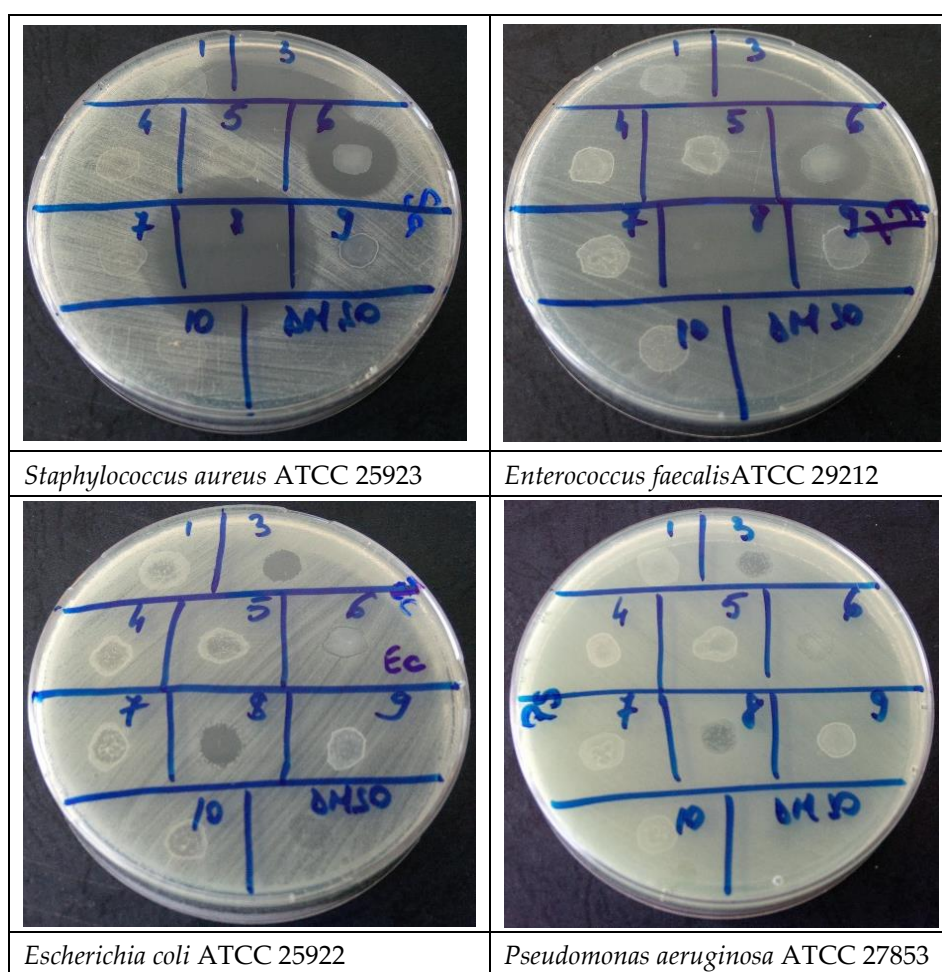

**Figure S10.** The Qualitative screening of the antimicrobial activity of the tested compounds (1- compound 4; 3- compound 2; 4- compound 5; 5- compound 7; 6- compound 10; 7- compound 6; 8- compound 3; 9- compound 8; 10- compound 9).
